# Supplementary material for: BH3 profiling discriminates the anti-apoptotic status of 5-fluorouracil-resistant colon cancer cells
Source: PubMed Central journal article supplement (PMC6826312; doi:10.3892/or.2019.7373), 2019-10-15

Figure S1. Apoptosis analysis by flow cytometry. Representative contour plot results of cells stained by Annexin V-PE and 7-AAD. Parental and 5-FU-resistant colon cancer cell lines were treated with 100  $\mu$ M 5-fluorouracil (5-FU) for 72 h, followed by the assessment of apoptosis by flow cytometry.

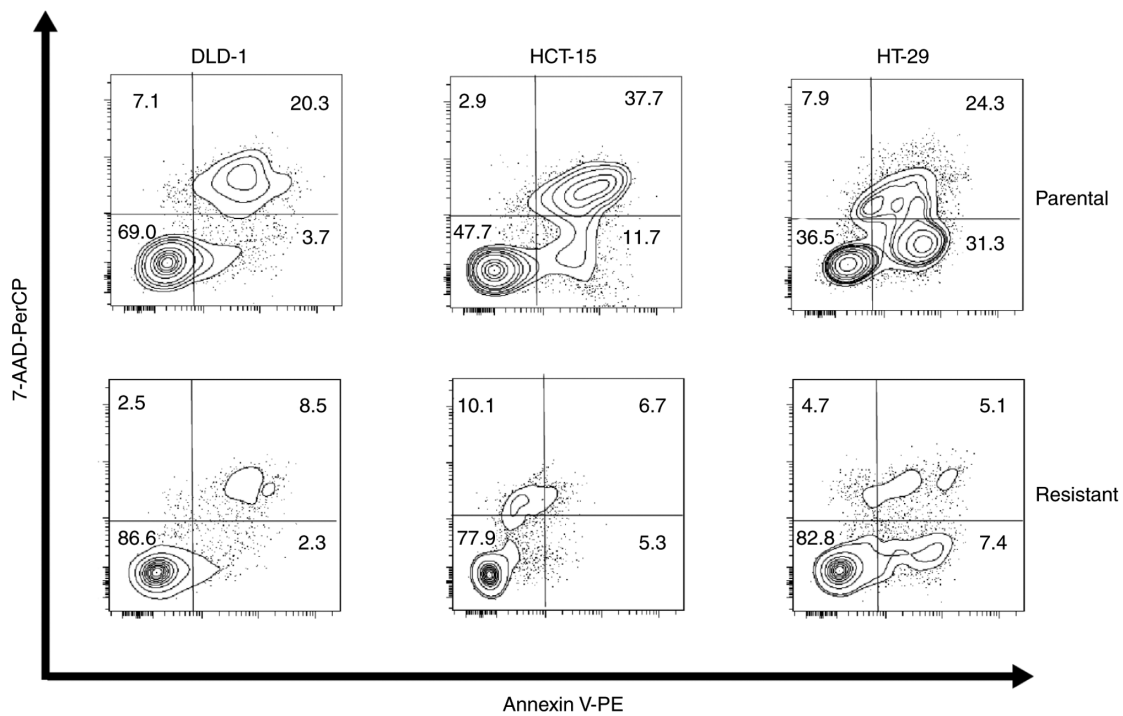

Figure S2. Images of mice with subcutaneous tumors at day 32 after treatment. There are 5 mice in each group.

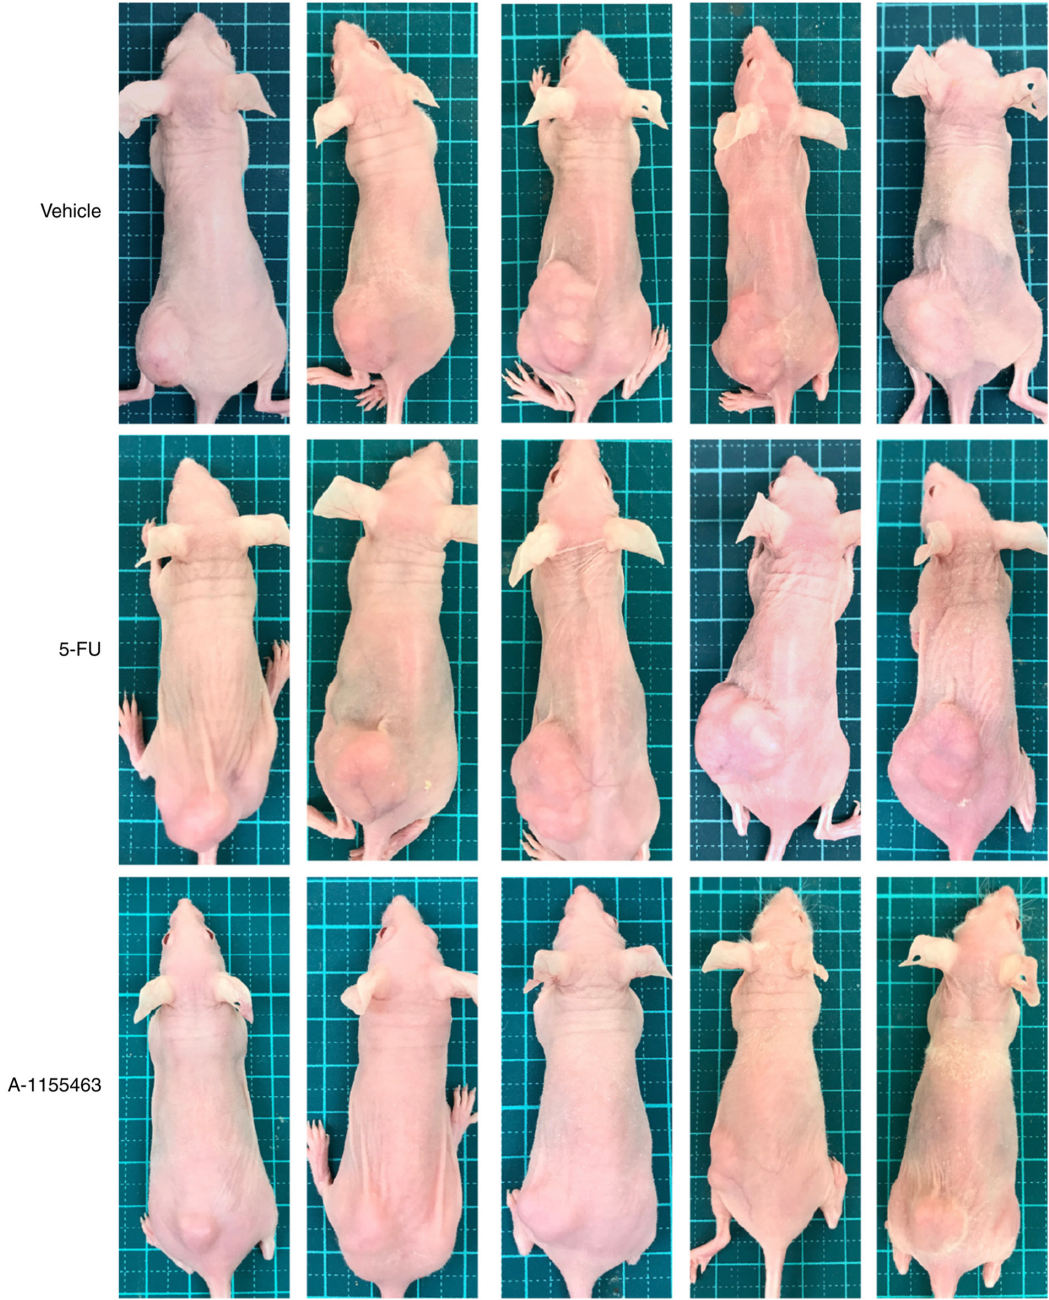

Figure S3. Body weight of mice treated with BCLXL inhibitor, A-1155463. Body weight of mice was monitored every 3 to 4 days. Data represent the mean  $\pm$  SD (n=5).

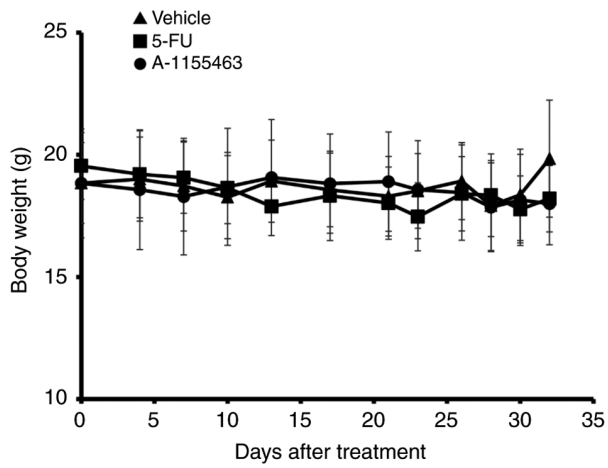

Figure S4. Histologic analysis of tumor sections stained with hematoxylin and eosin (H&E) and TUNEL. Scale bars, 100  $\mu$ m.

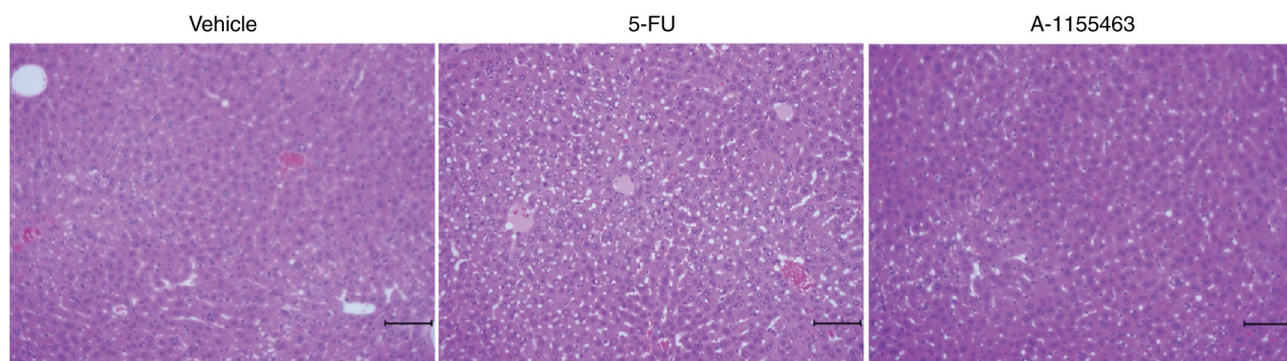

Supplement: Supplementary_Data.pdf [file Supplementary_Data.pdf]
